# Supplementary material for: Engineering conductive protein films through nanoscale self-assembly and gold nanoparticles doping
Source: Royal Society of Chemistry journal article supplement (doi:10.1039/d1nr00238d), 2021-01-01
Supplement: d1nr00238d1.pdf [file d1nr00238d1.pdf]

## Electronic Supplementary Information

### Engineering conductive protein films through nanoscale self-assembly and gold nanoparticles doping

*Sara Hernández Mejías<sup>‡</sup>, Elena López-Martínez,<sup>‡</sup> Maxence Fernandez, Pierre Couleaud, Ana Martín-Lasanta, David Romera, Ana Sanchez-Iglesias, Santiago Casado, Manuel R. Osorio, Jose M. Abad, M. Teresa González,<sup>\*</sup> and Aitziber L. Cortajarena<sup>\*</sup>*

#### Supporting Figures

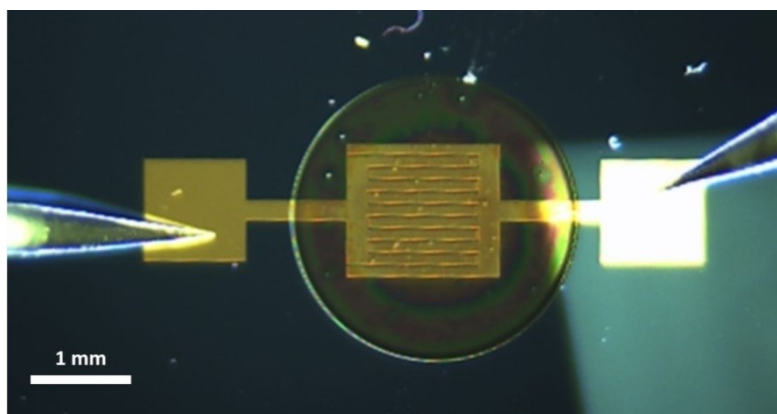

**Figure S1.** Set up used for conductive measurements. CTPR16<sub>4Cys</sub>-AuNPs film deposited over silicon wafers with gold electrodes patterned over them.

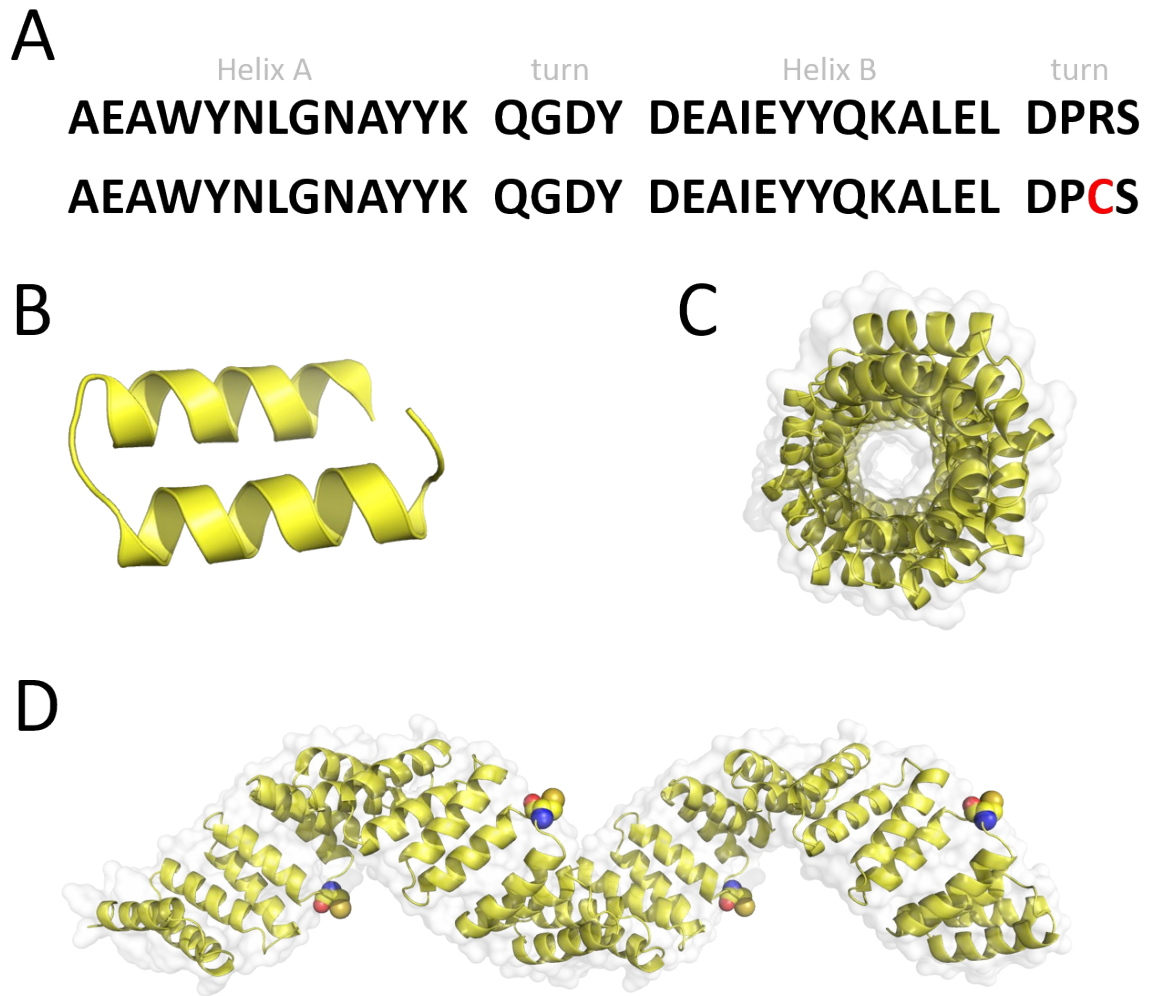

**Figure S2.** Sequence and structure of CTPR16<sub>4cys</sub>. (A) Sequences of the wild type CTPR consensus (top) and of the mutated CTPR including the cysteine residue used for repeats number 2, 6, 10 and 14 (down). (B) Ribbon representation of one CTPR repeat. (C) and (D) Ribbon representation of CTPR16<sub>4Cys</sub> with its mutated cysteine residues highlighted as colored spheres.

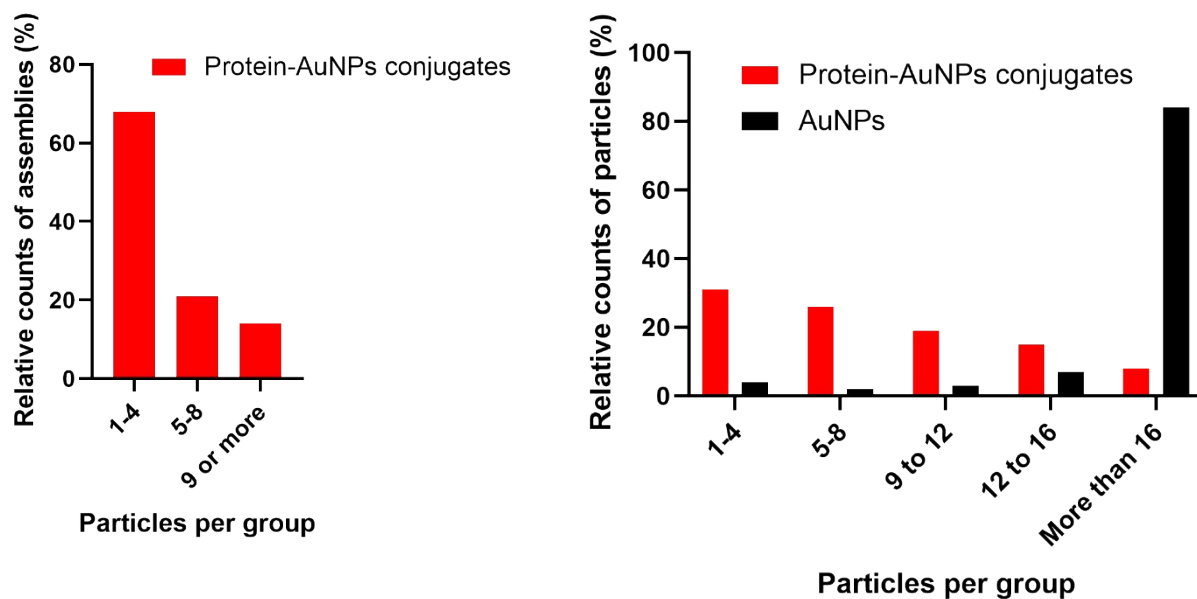

**Figure S3.** Histograms showing the nanoparticle distributions from TEM micrographs of CTPR16<sub>4Cys</sub>-AuNPs conjugates and AuNPs. Left panel: relative counts of assemblies shown by the number of particles per assembly (1 to 4, 5 to 8, and 9 or more particles per group). Right panel: relative counts of particles shown by the number of particles per group (1 to 4, 5 to 8, and 9 or more particles per group).
